# Supplementary material
Source: PubMed Central journal article supplement (PMC7975070)
Supplement: NIHMS1675989-supplement-Supplemental_Table.pdf [file NIHMS1675989-supplement-Supplemental_Table.pdf]

**Supplementary Table 1: Each Domain of On-School Exposure to E-Cigarettes (NYTS; n=17,977)**

|                                      | Bathroom/Locker Room | Classroom           | Inside, other (Hallway/Cafeteria) | Outside, other (Parking lot, Sidewalk) | Somewhere Else on Campus |
|--------------------------------------|----------------------|---------------------|-----------------------------------|----------------------------------------|--------------------------|
| <b>Percent Exposed</b>               | 34.4% (32.1 – 36.8)  | 22.3% (20.3 – 24.4) | 20.5% (18.7 – 22.4)               | 34.0% (32.0 – 36.2)                    | 29.2% (28.0 – 30.3)      |
| Sex                                  |                      |                     |                                   |                                        |                          |
| Male                                 | 33.8% (31.2 – 36.5)  | 22.4% (20.2 – 24.9) | 20.8% (18.7 – 23.1)               | 36.3% (33.8 – 38.9)                    | 28.8% (27.7 – 30.0)      |
| Female                               | 35.0% (32.6 – 37.4)  | 22.2% (20.1 – 24.4) | 20.2% (18.2 – 22.2)               | 32.0% (29.8 – 34.2)                    | 29.5% (27.8 – 31.3)      |
| Grade level <sup>a</sup>             |                      |                     |                                   |                                        |                          |
| Middle School                        | 18.5% (16.4 – 20.7)  | 9.2% (7.5 – 11.1)   | 8.8% (7.6 – 10.3)                 | 21.3% (19.4 – 23.4)                    | 30.3% (28.5 – 32.1)      |
| High School                          | 46.7% (43.3 – 50.0)  | 32.4% (29.4 – 35.5) | 29.4% (26.8 – 32.3)               | 43.8% (41.0 – 46.6)                    | 28.4% (26.9 – 29.9)      |
| Race/Ethnicity                       |                      |                     |                                   |                                        |                          |
| Non-Hispanic, White                  | 38.3% (35.5 – 41.1)  | 25.0% (22.5 – 27.6) | 22.4% (20.4 – 24.6)               | 37.9% (35.4 – 40.4)                    | 30.2% (28.9 – 31.6)      |
| Hispanic/Latino                      | 31.0% (28.1 – 34.0)  | 21.2% (18.7 – 24.0) | 19.5% (17.2 – 22.0)               | 31.0% (28.5 – 33.6)                    | 29.2% (27.4 – 31.1)      |
| Non-Hispanic, Black                  | 24.6% (20.5 – 29.2)  | 14.0% (11.4 – 17.0) | 14.0% (11.6 – 16.9)               | 22.7% (20.3 – 25.4)                    | 24.9% (22.0 – 28.1)      |
| Non-Hispanic, Other <sup>b</sup>     | 34.9% (30.9 – 39.1)  | 21.2% (18.0 – 24.8) | 20.9% (17.2 – 25.0)               | 35.4% (31.2 – 39.8)                    | 29.1% (26.7 – 31.7)      |
| Ever Used Other Tobacco <sup>c</sup> |                      |                     |                                   |                                        |                          |
| No                                   | 31.7% (29.3 – 34.2)  | 19.0% (17.1 – 21.1) | 17.7% (15.9 – 19.6)               | 31.3% (29.0 – 33.7)                    | 29.1% (28.0 – 30.3)      |
| Yes                                  | 42.4% (39.3 – 45.4)  | 31.9% (28.9 – 35.0) | 28.8% (26.0 – 31.9)               | 42.0% (39.5 – 44.6)                    | 29.4% (27.2 – 31.7)      |

All cells contain estimate percentage and 95% Confidence Interval.

a Middle School reflects 6<sup>th</sup> – 8<sup>th</sup> grades; High School reflects 9<sup>th</sup> – 12<sup>th</sup> grades

b For this study, “other” reflects non-Hispanic, Asian; multiracial; and any other race

c Self-reported use, even once, of any of the following products: combustible cigarettes; cigars; smokeless; hookah; snus; dissolvable; pipe tobacco; and bidis
